# Supplementary material for: Tuning of intramolecular charge transfer properties and charge distributions in ferrocene-appended catechol derivatives by chemical substitution
Source: Royal Society of Chemistry journal article supplement (doi:10.1039/c5dt01998b), 2015-01-01
Supplement: c5dt01998b1.pdf [file c5dt01998b1.pdf]

**Electronic Supplementary Information (ESI) for**

**Tuning of intramolecular charge transfer properties and charge distributions in ferrocene-appended catechol derivatives by chemical substitution**

**Keishiro Tahara,<sup>a,\*</sup> Shogo Akehi,<sup>a</sup> Tetsuhiro Akita,<sup>a</sup> Shohei Katao,<sup>a</sup> Jun-ichi Kikuchi,<sup>a,\*</sup> and Ken Tokunaga<sup>b</sup>**

<sup>a</sup> *Graduate School of Materials Science, Nara Institute of Science and Technology, 8916-5, Takayama, Ikoma, 6300192, Japan.*

<sup>b</sup> *Division of Liberal Arts, Kogakuin University, 2665-1, Nakano, Hachioji, Tokyo 1920015, Japan.*

**Contents**

- 1. Characterization of new compounds**
- 2. Differential NOE experiments**
- 3. Electrochemical data**
- 4. Chemical oxidation followed by UV-vis-NIR spectroscopy**
- 5. DFT calculation**
- 6. X-ray crystallographic data**
- 7. Chemical oxidation followed by <sup>1</sup>H-NMR**

## 1. Characterization of new compounds

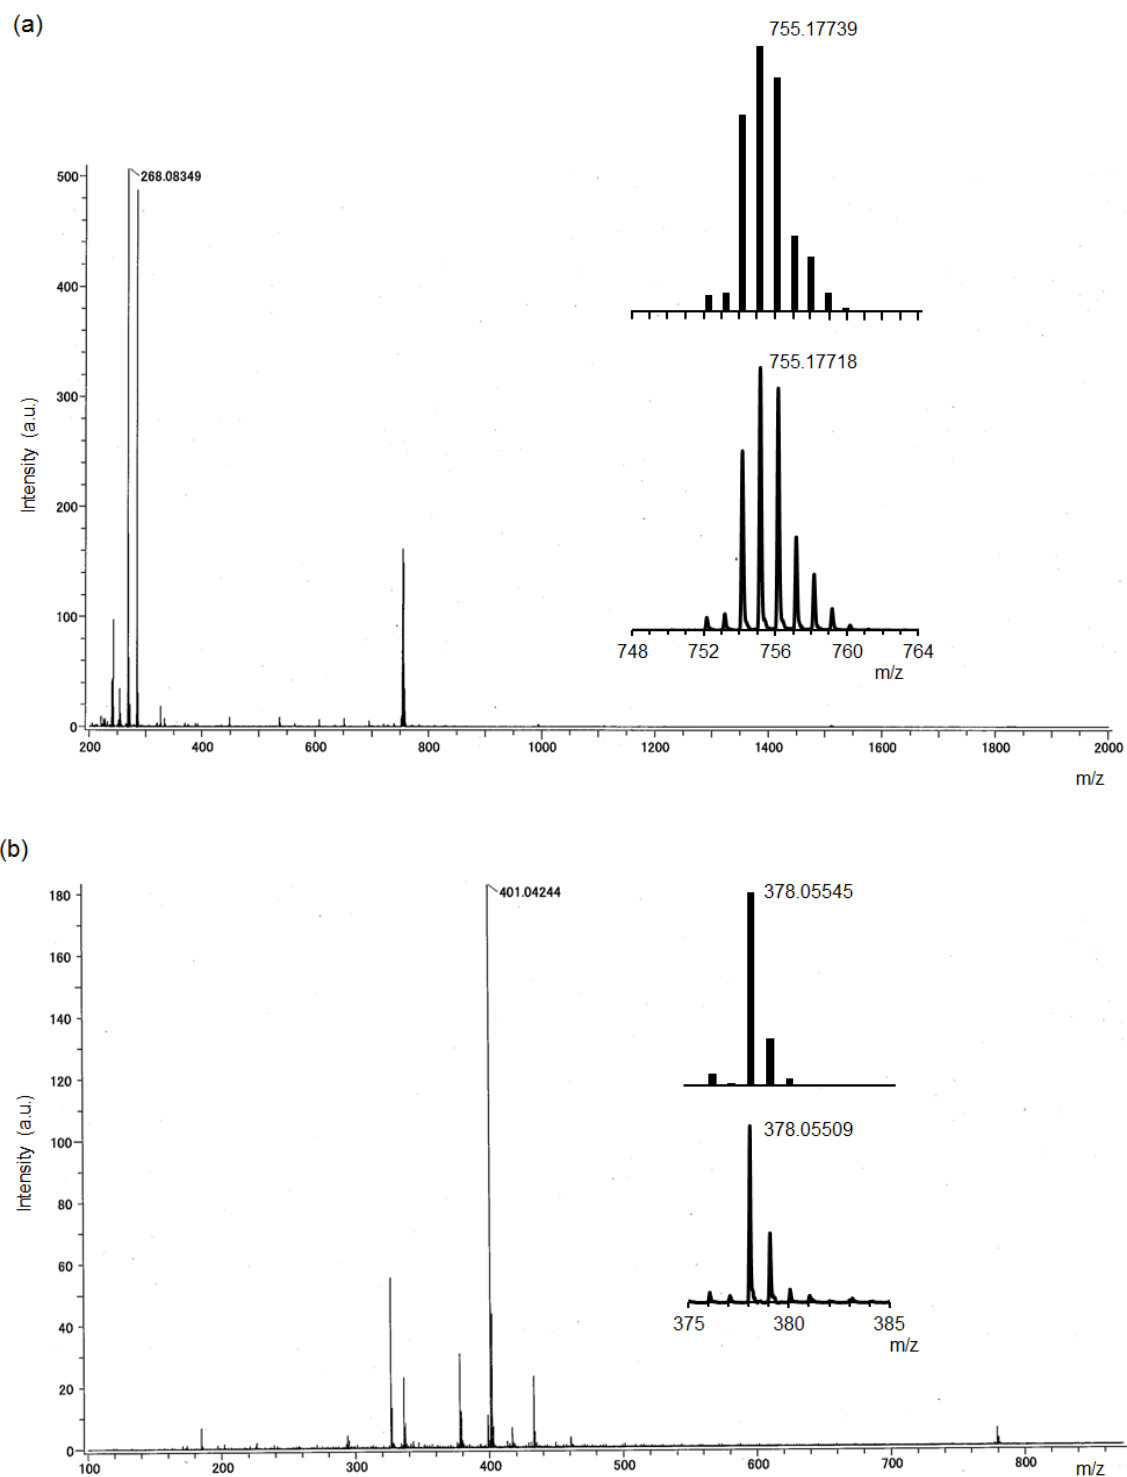

**Figure S1.** HR-ESI-MS of (a) **3** and (b) **5**. Inset: experimental (bottom) and theoretical (top) isotopic distributions for [M]<sup>+</sup>.

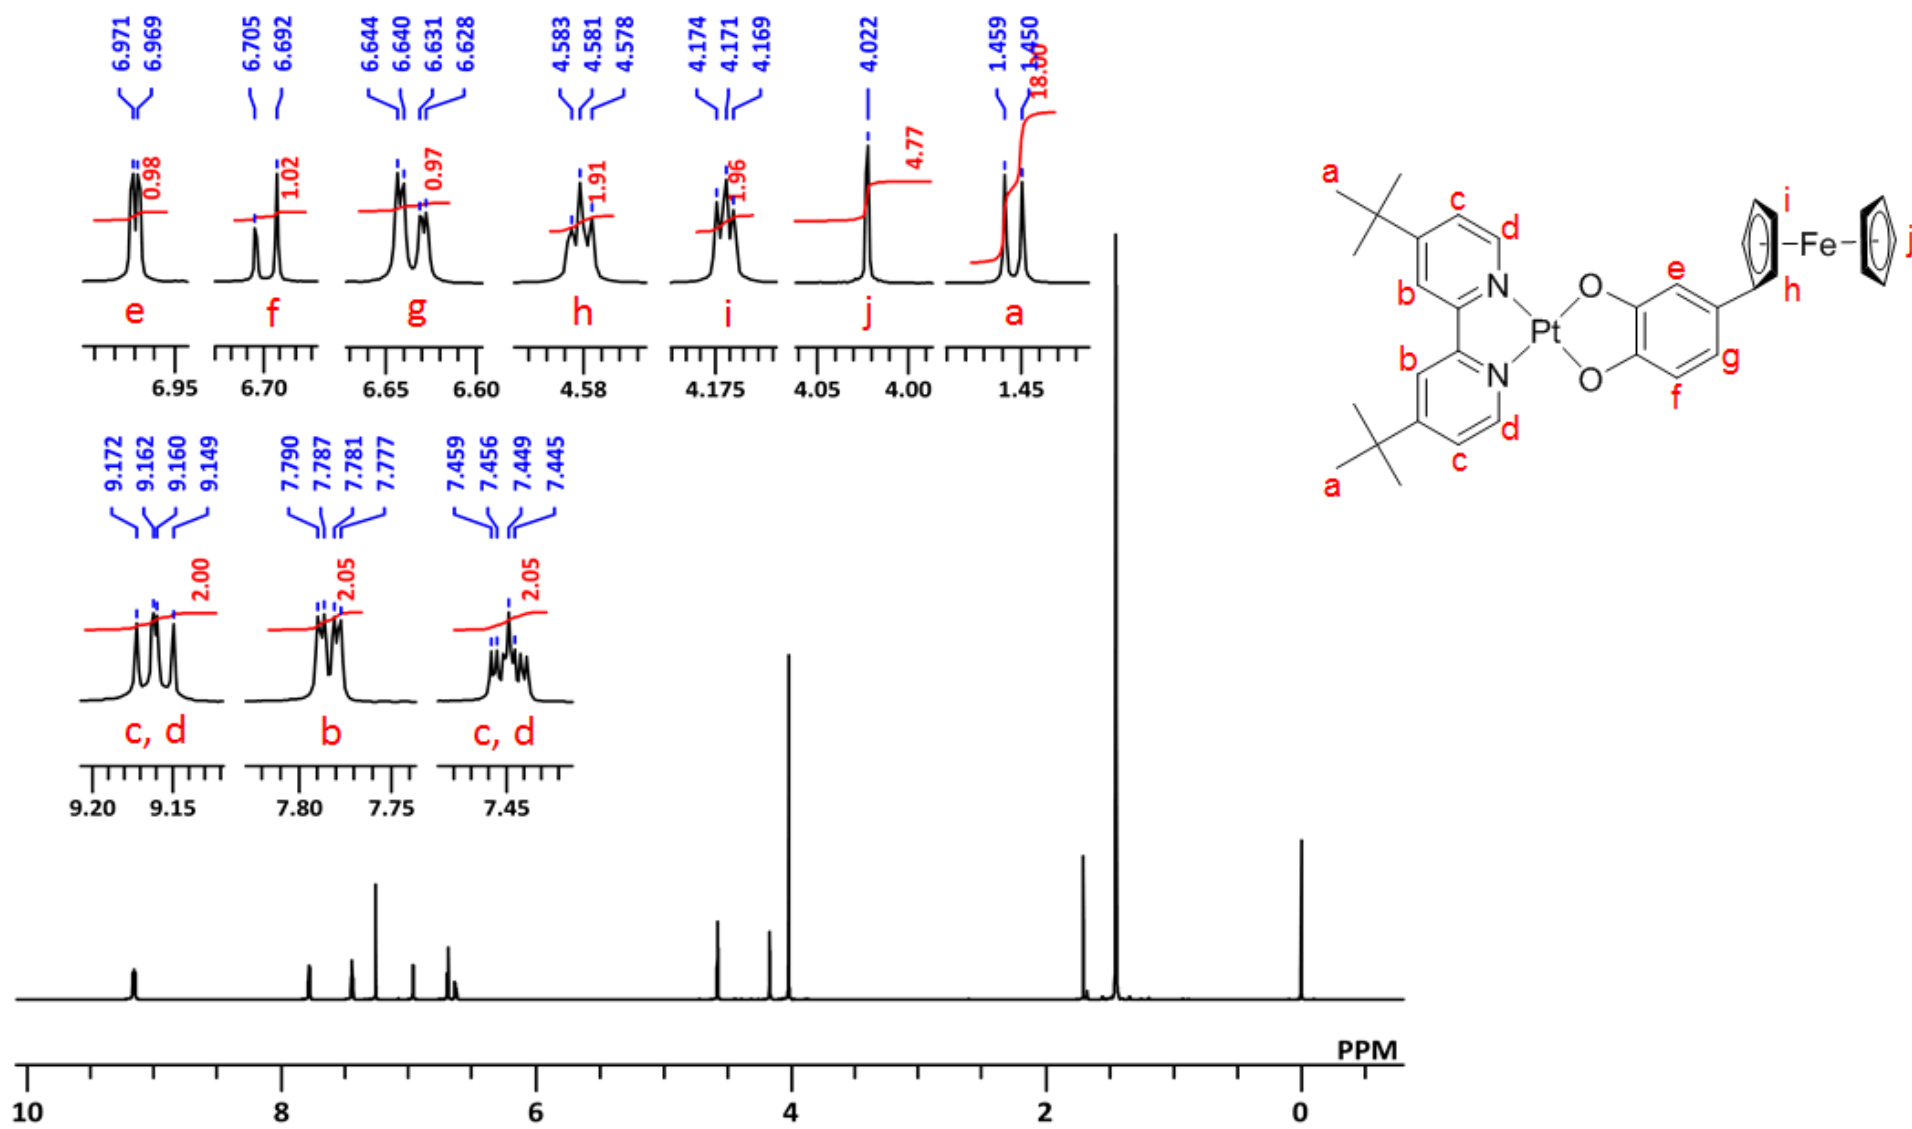

Figure S2. <sup>1</sup>H-NMR spectrum of **3** in CDCl<sub>3</sub> (600 MHz).

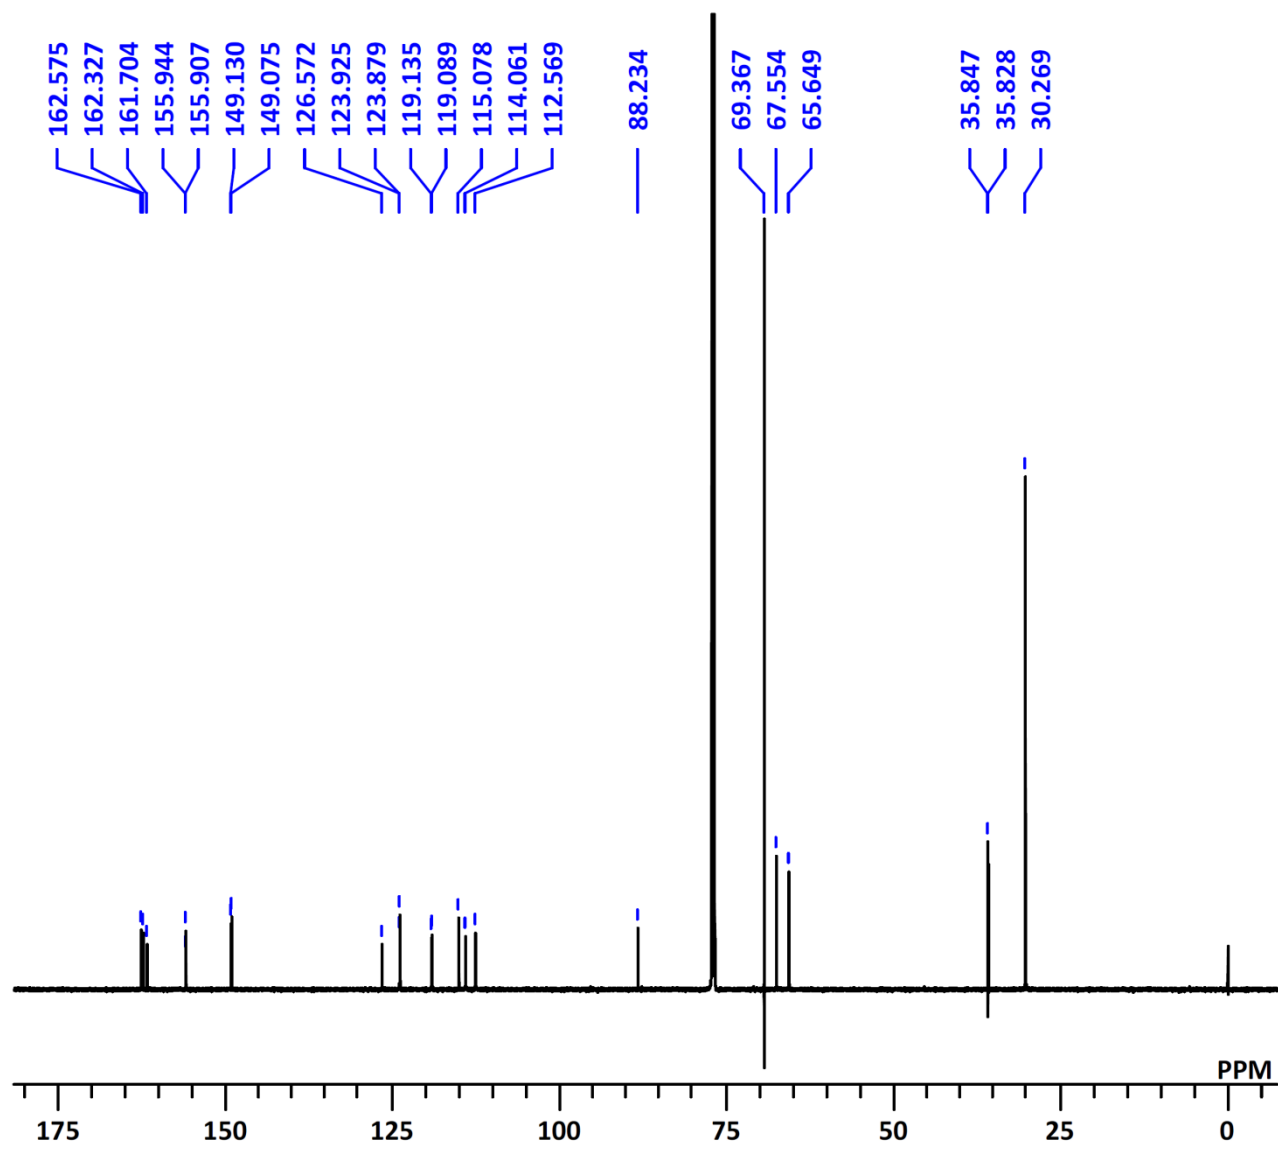

Figure S3.  $^{13}\text{C}$ -NMR spectrum of **3** in  $\text{CDCl}_3$  (150 MHz).

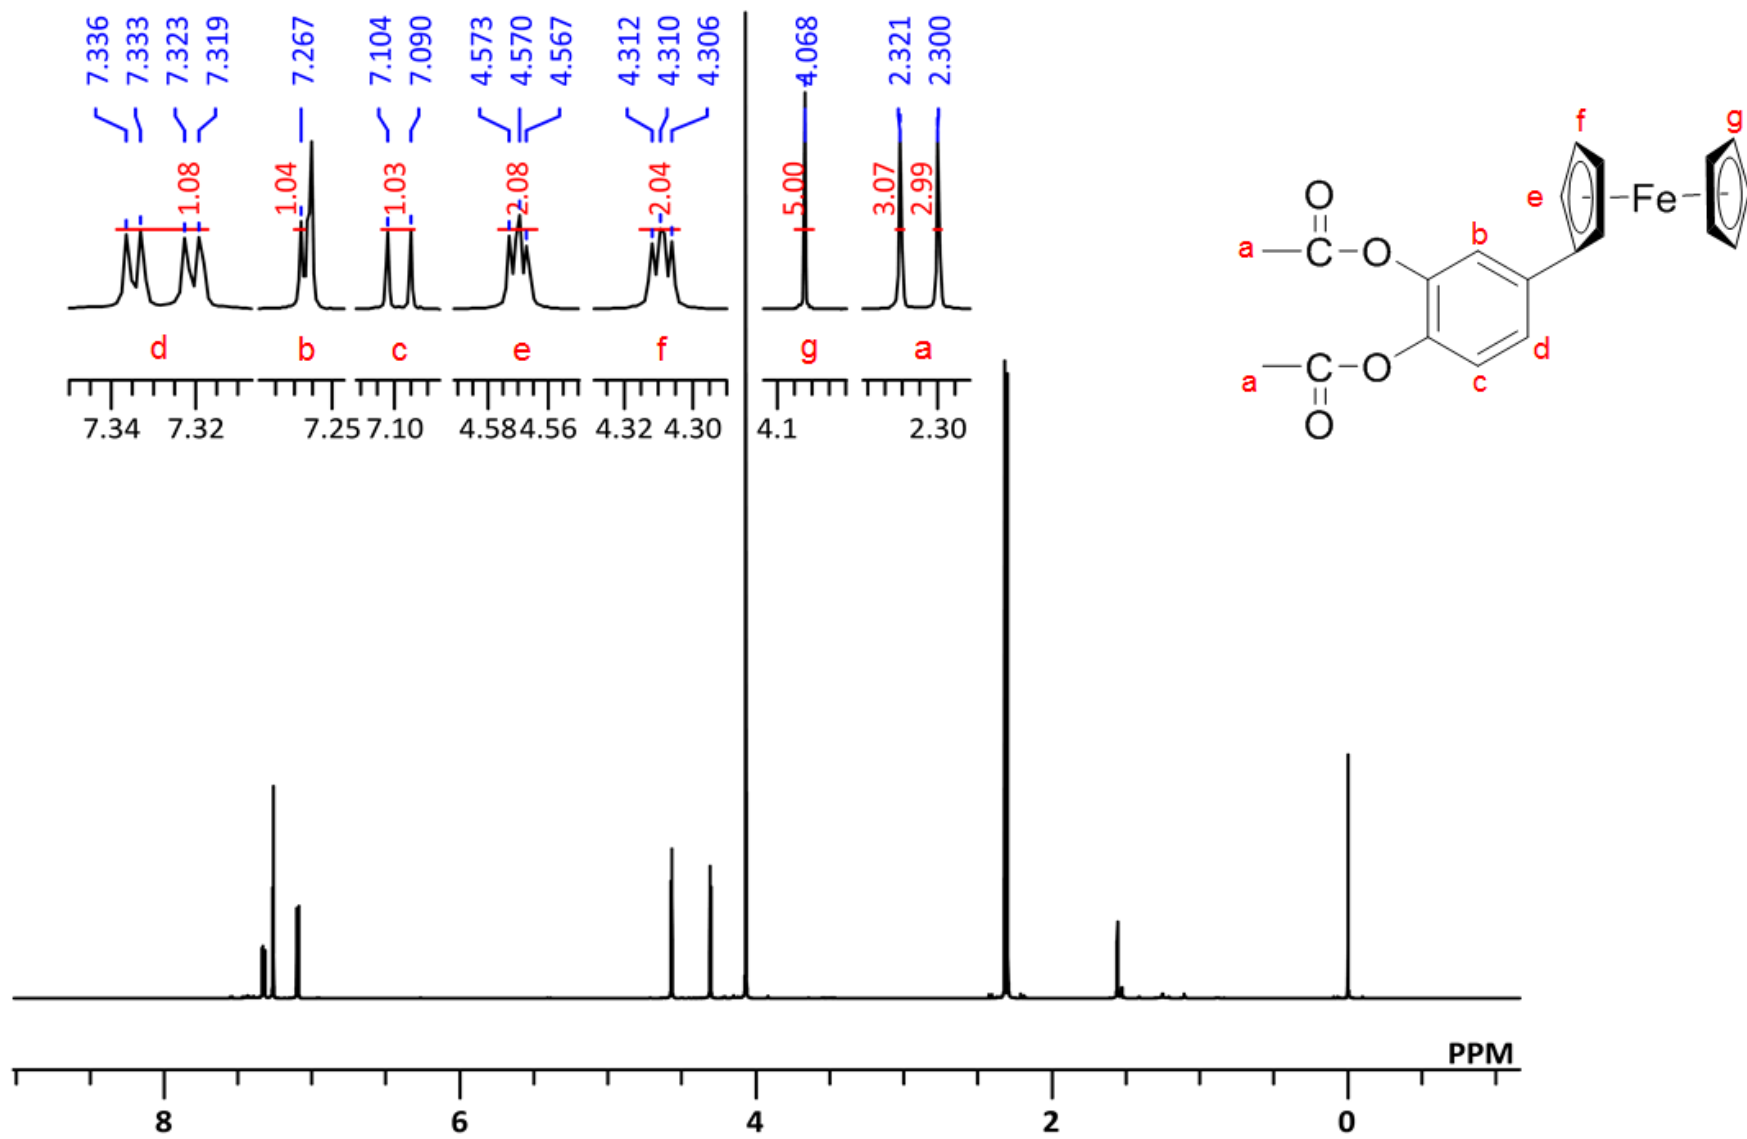

Figure S4.  $^1\text{H-NMR}$  spectrum of **5** in  $\text{CDCl}_3$  (600 MHz).

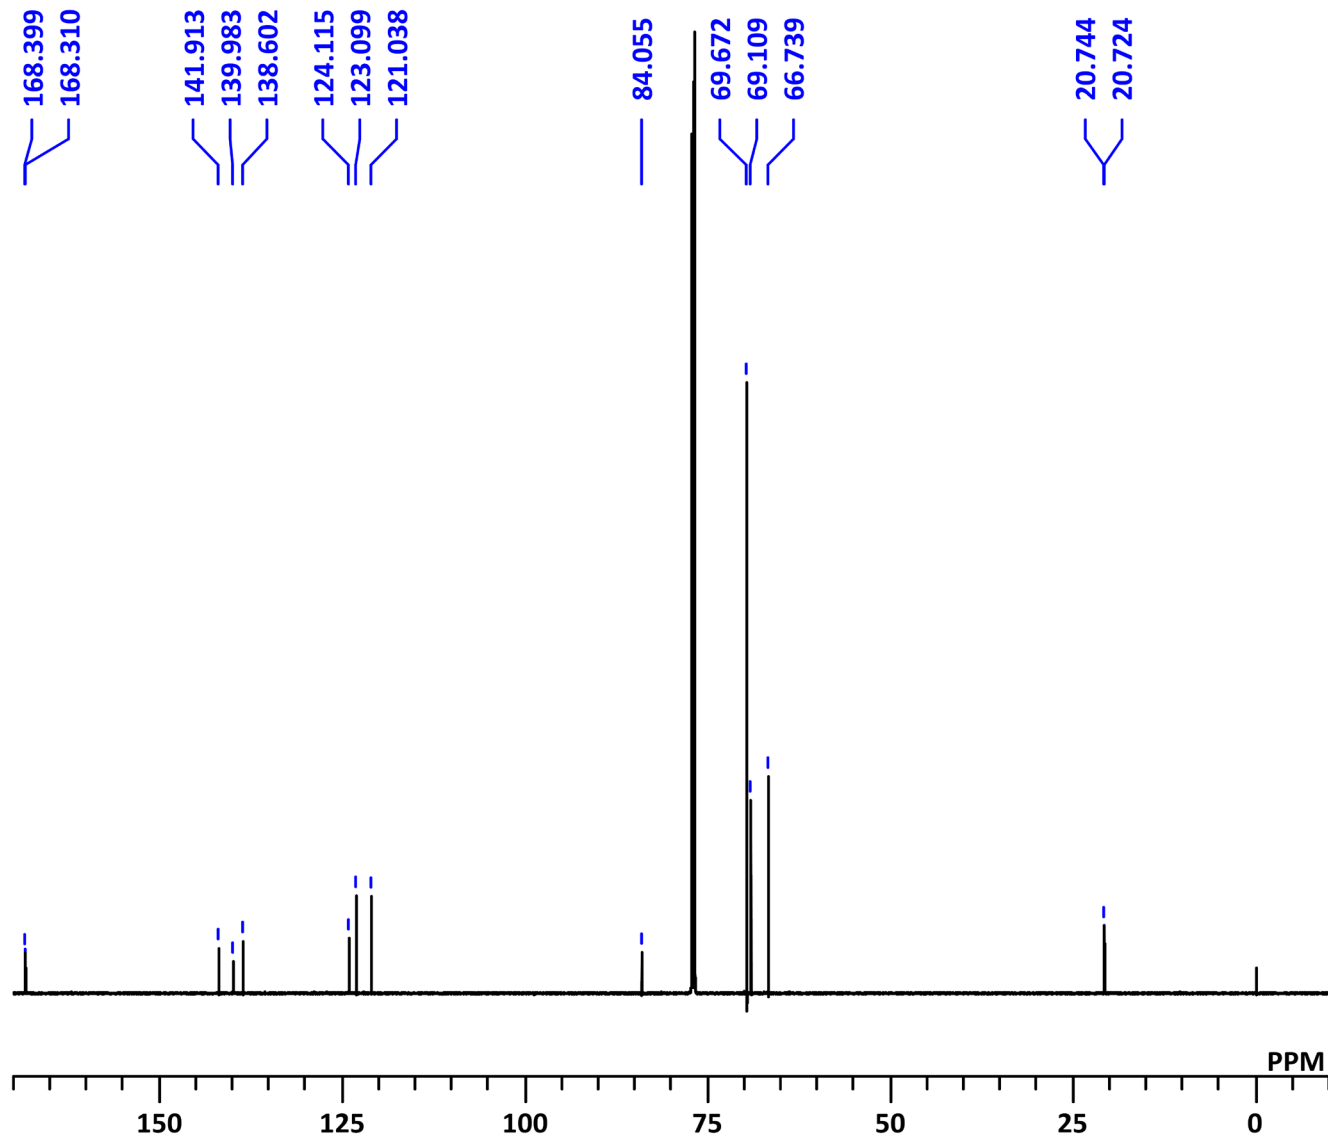

Figure S5. <sup>13</sup>C-NMR spectrum of **5** in CDCl<sub>3</sub> (150 MHz).

## 2. Differential NOE experiments

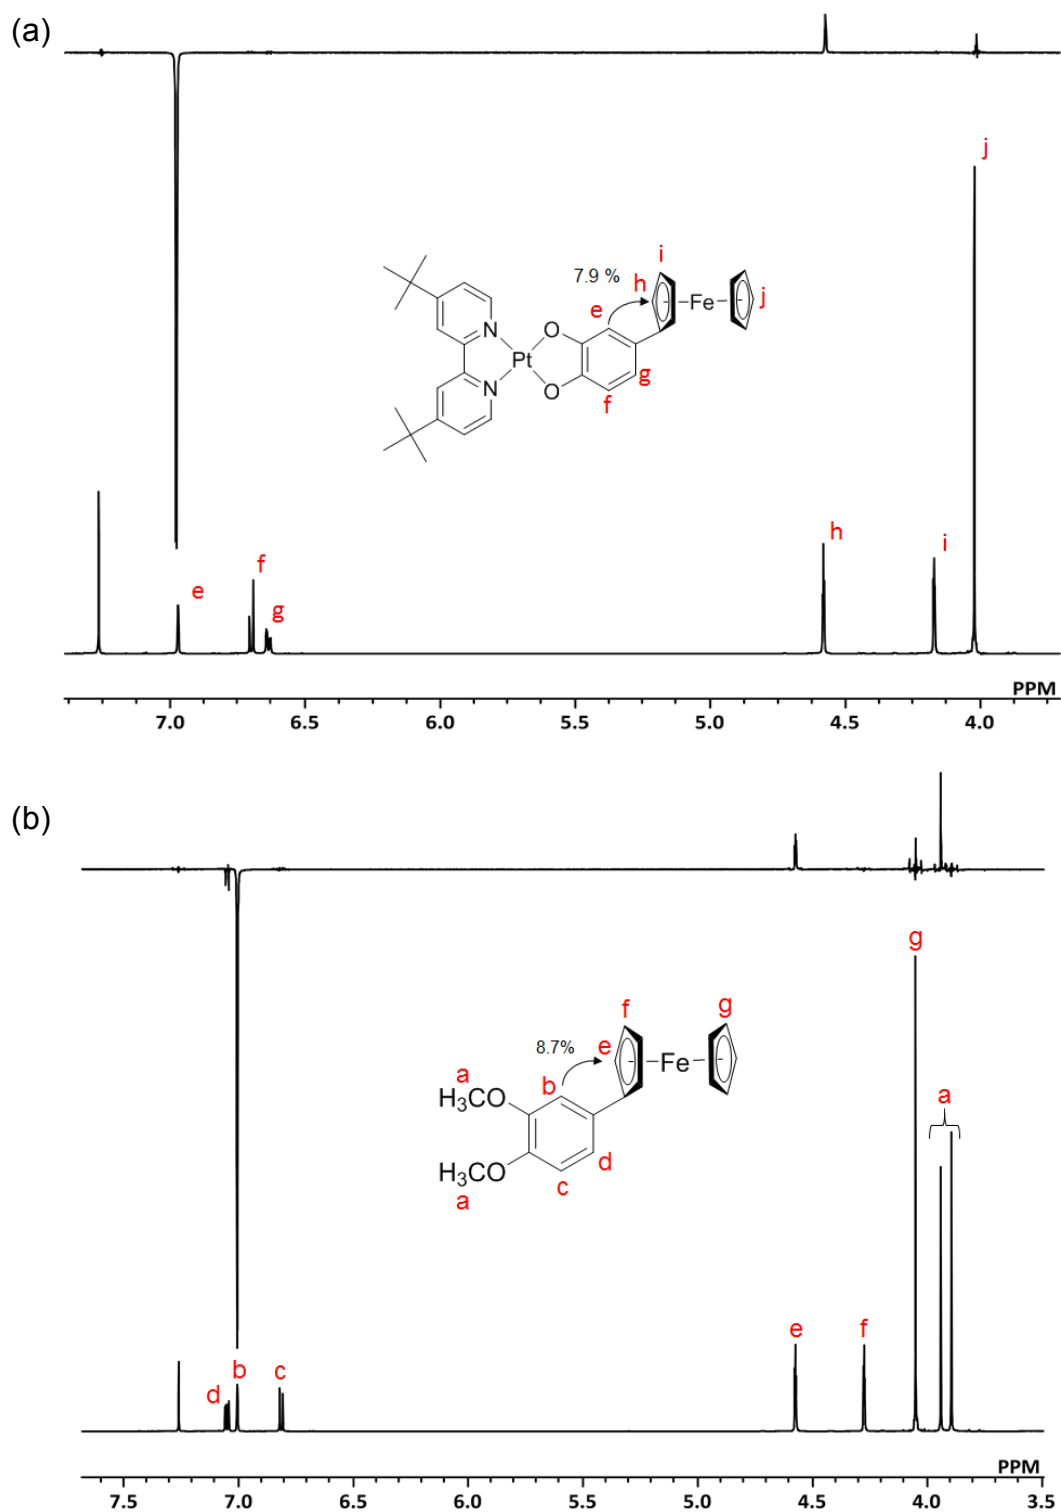

**Figure S6.** Partial  $^1\text{H-NMR}$  (bottom) and differential NOE (top) spectra of (a) **3** and (b) **1** in  $\text{CDCl}_3$ . A nuclear overhauser effects between protons is indicated as an arrow.

### 3. Electrochemical data

**Table S1.** Electrochemical data for Fc derivatives.<sup>a</sup>

| compound                                 | $E_{1/2}^1$      | $E_{1/2}^2$       |
|------------------------------------------|------------------|-------------------|
| <b>1</b>                                 | 568 <sup>b</sup> | 1668 <sup>c</sup> |
| <b>2</b>                                 | 486 <sup>b</sup> | 653 <sup>b</sup>  |
| <b>3</b>                                 | 321              | 845               |
| <b>4</b>                                 | 588              | 1938 <sup>c</sup> |
| <b>5</b>                                 | 649              | 1922 <sup>c</sup> |
| Pt( <sup>t</sup> Bu <sub>2</sub> bpy)(C) | 534              | 1570              |

<sup>a</sup>Potentials in mV vs. Fc<sup>\*+</sup>/Fc\*. In CH<sub>2</sub>Cl<sub>2</sub> (1.0 mM) containing 0.1M <sup>n</sup>Bu<sub>4</sub>NPF<sub>6</sub>.

<sup>b</sup>Previous work.<sup>1</sup> <sup>c</sup> $E_{ox}^2$  values were adopted because irreversible waves were observed.

---

#### References

1. Tahara, K.; Akita, T.; Katao, S.; Kikuchi, J. *Dalton Trans.* **2014**, *43*, 1368-1379.



#### 4. Chemical oxidation

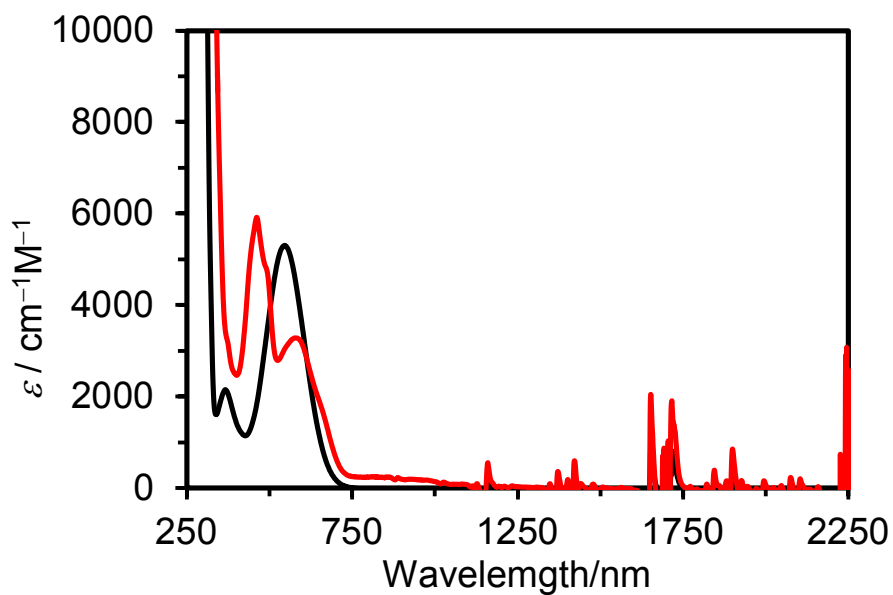

**Figure S7.** UV-vis-NIR spectra of Pt(<sup>t</sup>Bu<sub>2</sub>bpy)(C) in the absence (black line) and presence of 1.0 equiv. of magic blue (black line) in CH<sub>2</sub>Cl<sub>2</sub>.

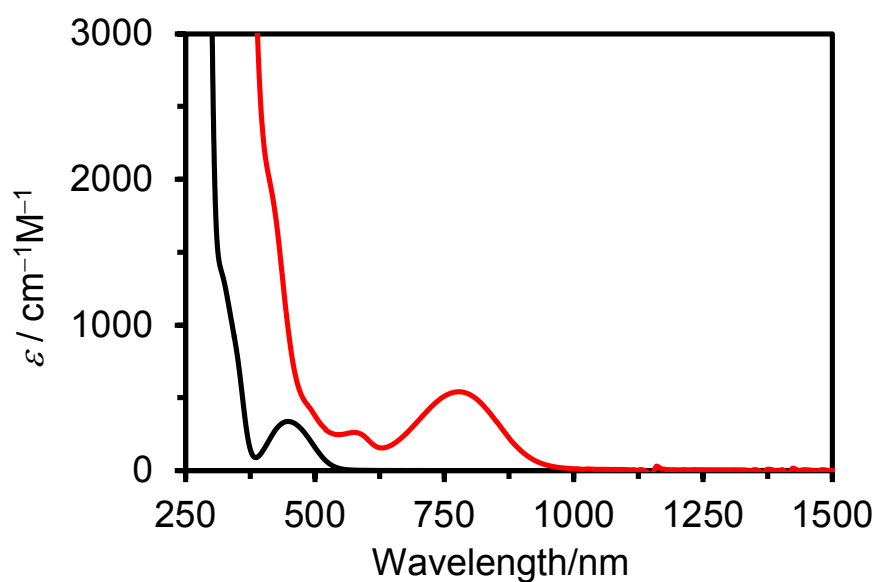

**Figure S8.** UV-vis-NIR spectra of **4** in the absence (black line) and presence of 0.8 equiv. of magic blue (black line) in CH<sub>2</sub>Cl<sub>2</sub>.

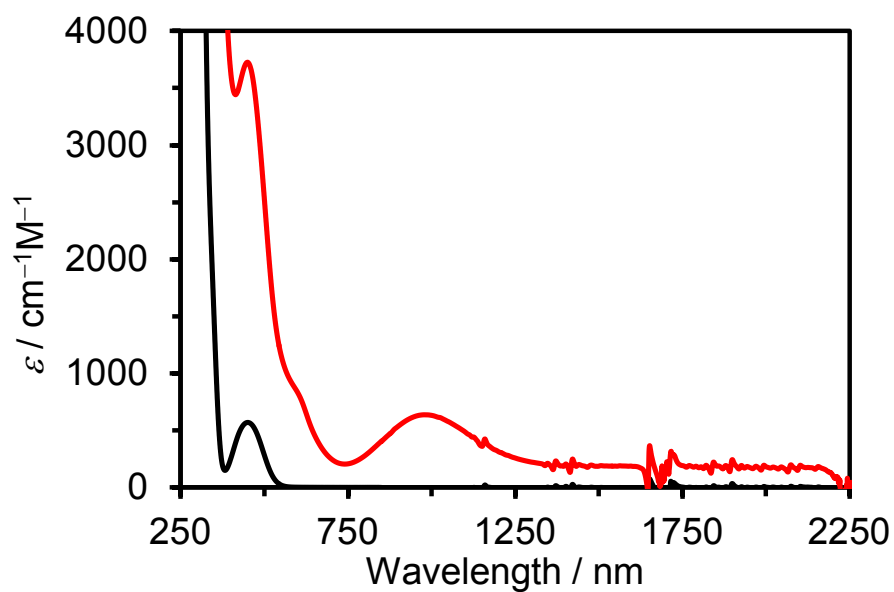

**Figure S9.** UV-vis-NIR spectra of **2** in the absence (black line) and presence of 1.0 equiv. of magic blue (black line) in  $\text{CH}_2\text{Cl}_2$ .

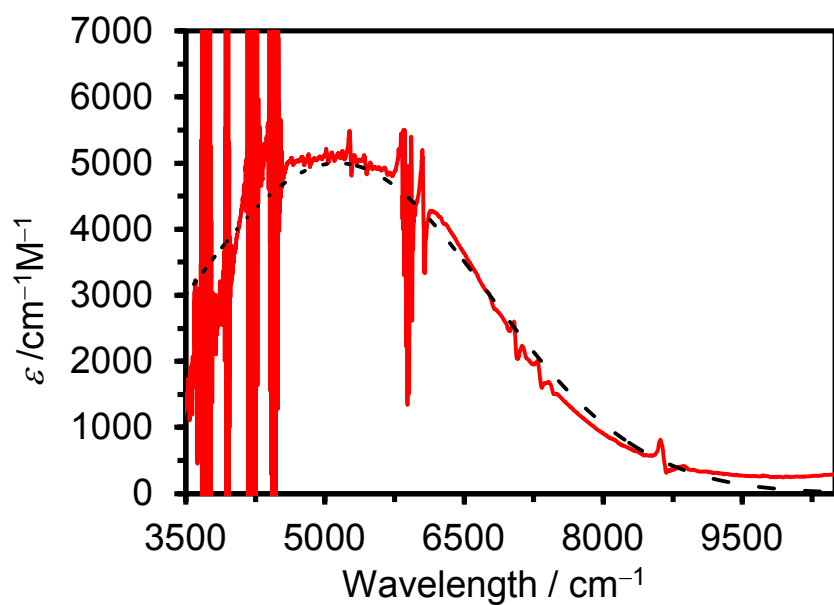

**Figure S10.** NIR spectra of  $\mathbf{3}^+$  (red line) with Gaussian deconvolution (black broken line).

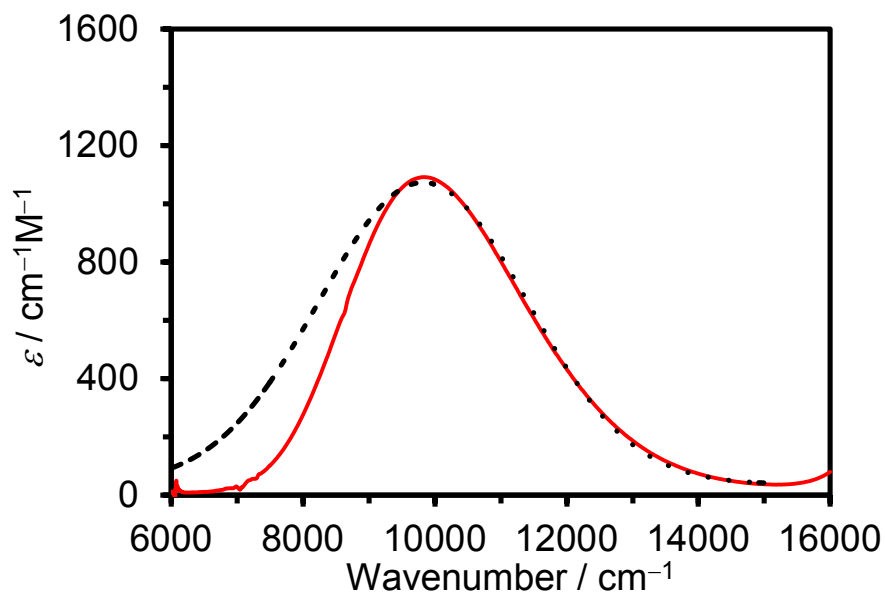

**Figure S11.** NIR spectra of  $1^+$  (red line) with Gaussian deconvolution (black broken line).

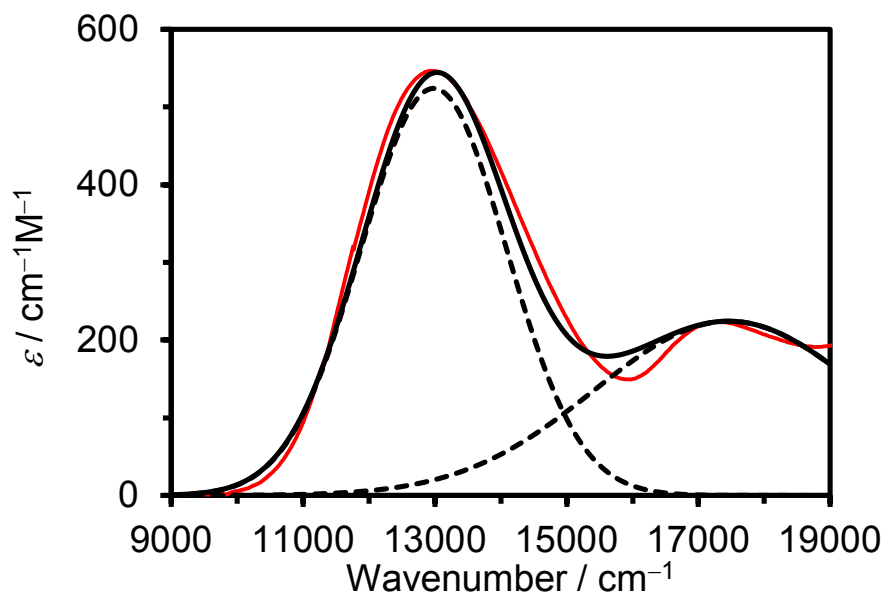

**Figure S12.** NIR spectra of  $5^+$  (red line) with Gaussian deconvolution (black broken line) and the sum (black line).

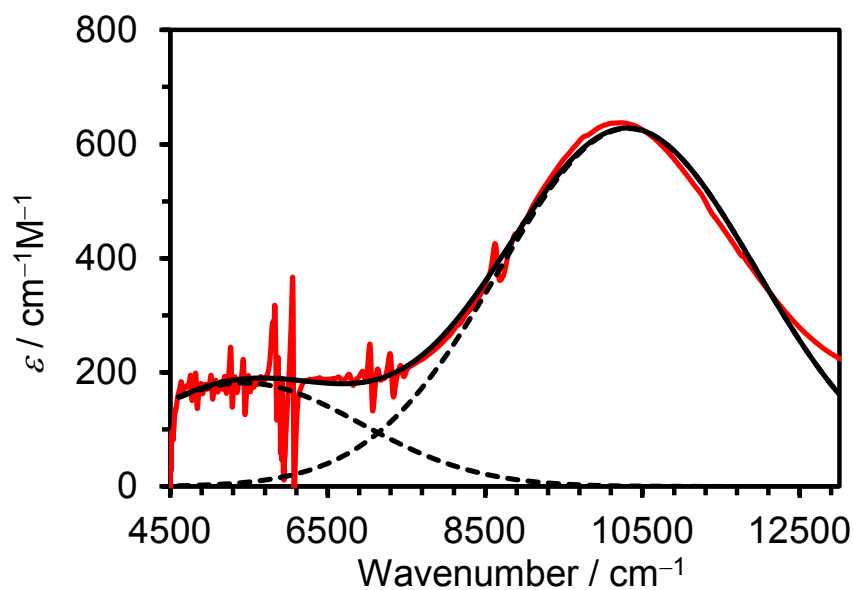

**Figure S13.** NIR spectra of  $2^+$  (red line) with Gaussian deconvolution (black broken line).

**Table S2.** Parameters of IVCT and ICT bands and electronic coupling of  $2^+$ .

|                                              | IVCT               | ICT                |
|----------------------------------------------|--------------------|--------------------|
| $\Delta\nu_{1/2}$ ( $\text{cm}^{-1}$ )       | 3510               | 3840               |
| $\nu_{\text{max}}$ ( $\text{cm}^{-1}$ )      | 5430               | 10310              |
| $\epsilon_{\text{max}}$ ( $\text{cm}^{-1}$ ) | 180                | 630                |
| $r_{\text{DA}}$ ( $\text{\AA}$ )             | 6.808 <sup>a</sup> | 5.847 <sup>b</sup> |
| $H_{\text{AB}}$ ( $\text{cm}^{-1}$ )         | 180                | 560                |
| $\alpha^c$                                   | 0.033              | 0.054              |
| $\Delta G^0$ ( $\text{cm}^{-1}$ )            | 0                  | 9630               |
| $\lambda$ ( $\text{cm}^{-1}$ )               | 5430               | 680                |

<sup>a</sup> The distance between Fe atoms. <sup>b</sup> Average of distances between Fe and the center of C-C-C-O of the catecholate moiety. <sup>c</sup> Delocalization parameter  $\alpha = H_{\text{AB}}/\nu_{\text{max}}$ .

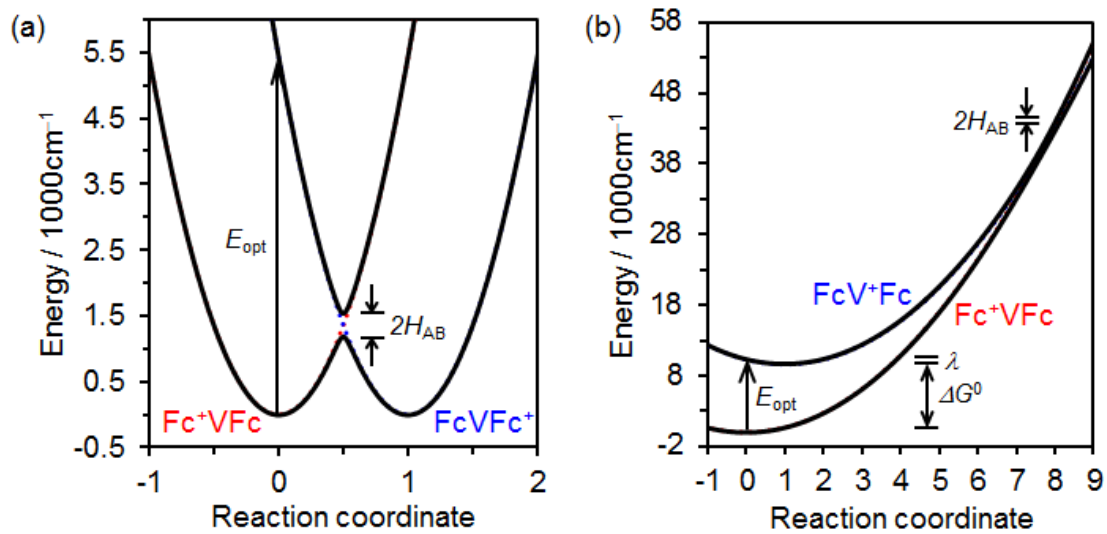

**Figure S14.** Diabatic (dashed line) and adiabatic (solid line) potential energy surfaces of (a) the  $Fc^+VFc$  and  $FcVFc^+$  states and (b) the  $FcV^+Fc$  and  $Fc^+VFc$  states for  $2^+$  as a function the ET reaction coordinate.

#### 4. DFT calculations

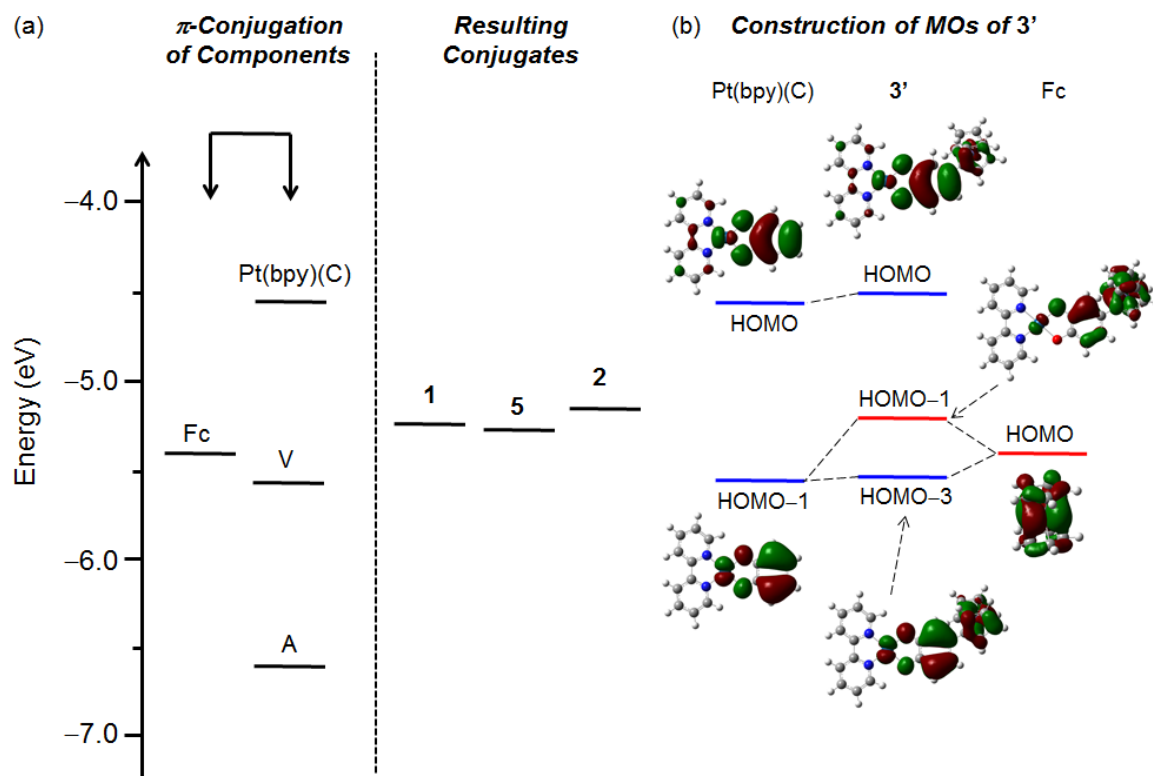

**Figure S15.** (a) Calculated HOMO levels with IEFPCM ( $\text{CH}_2\text{Cl}_2$ ). (b) Selected molecular orbitals (MOs) for **3** calculated using a DFT method with IEFPCM ( $\text{CH}_2\text{Cl}_2$ ).

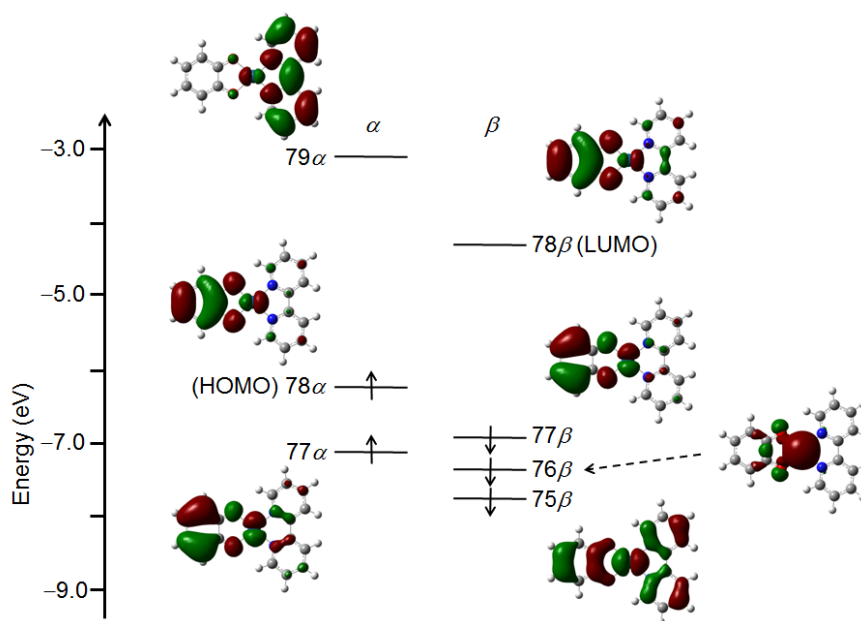

**Figure S16.** Selected molecular orbitals for  $[\text{Pt}(\text{bpy})(\text{C})]^+$  calculated using a DFT method with IEFPCM ( $\text{CH}_2\text{Cl}_2$ ).

**Table S3.** Coordinates of optimized gas-phase geometries of **3** and **3<sup>+</sup>** calculated using a DFT method (B3LYP or UB3LYP/ Lan2DZ (Fe and Pt atoms) and 6-31G(d) (all other atoms) levels of theory) with IEFPCM (CH<sub>2</sub>Cl<sub>2</sub>).

| <b>3</b>      |               |                 |          |          |  |
|---------------|---------------|-----------------|----------|----------|--|
| Center Number | Atomic Number | Coordinates (Å) |          |          |  |
|               |               | X               | Y        | Z        |  |
| 1             | 7             | 4.155601        | -1.02445 | 0.265403 |  |
| 2             | 7             | 3.558831        | 1.474992 | -0.09122 |  |
| 3             | 8             | 0.59662         | 0.768977 | -0.45732 |  |
| 4             | 8             | 1.193167        | -1.81415 | -0.08741 |  |
| 5             | 6             | -0.40135        | -0.12773 | -0.54575 |  |
| 6             | 6             | -0.07416        | -1.50489 | -0.34194 |  |
| 7             | 6             | -1.08433        | -2.47976 | -0.42227 |  |
| 8             | 6             | -2.39134        | -2.10651 | -0.7033  |  |
| 9             | 1             | -3.15215        | -2.87686 | -0.77338 |  |
| 10            | 6             | -1.7115         | 0.231506 | -0.82839 |  |
| 11            | 6             | 4.329922        | -2.34884 | 0.428902 |  |
| 12            | 1             | 3.432132        | -2.95133 | 0.354407 |  |
| 13            | 6             | 5.584316        | -2.8924  | 0.676387 |  |
| 14            | 1             | 5.686859        | -3.96398 | 0.803151 |  |
| 15            | 6             | 6.686908        | -2.04007 | 0.755947 |  |
| 16            | 1             | 7.678564        | -2.43555 | 0.948217 |  |
| 17            | 6             | 6.503008        | -0.67013 | 0.585099 |  |
| 18            | 1             | 7.347483        | 0.00608  | 0.642962 |  |
| 19            | 6             | 5.221523        | -0.17581 | 0.338876 |  |
| 20            | 6             | 4.882965        | 1.240373 | 0.137907 |  |
| 21            | 6             | 5.791851        | 2.298709 | 0.16627  |  |
| 22            | 1             | 6.842773        | 2.110371 | 0.349049 |  |
| 23            | 6             | 5.336549        | 3.598296 | -0.04241 |  |
| 24            | 1             | 6.034799        | 4.428278 | -0.02231 |  |
| 25            | 6             | 3.977886        | 3.81718  | -0.27651 |  |
| 26            | 1             | 3.585474        | 4.813682 | -0.44351 |  |
| 27            | 6             | 3.114453        | 2.728997 | -0.29398 |  |
| 28            | 1             | 2.04902         | 2.823342 | -0.46894 |  |
| 29            | 1             | -0.82           | -3.52219 | -0.26995 |  |
| 30            | 1             | -1.93043        | 1.282782 | -0.98672 |  |
| 31            | 6             | -2.73293        | -0.74966 | -0.9123  |  |
| 32            | 6             | -4.09347        | -0.37662 | -1.23852 |  |
| 33            | 6             | -5.25288        | -1.23562 | -1.26325 |  |
| 34            | 6             | -4.5974         | 0.953034 | -1.47832 |  |
| 35            | 6             | -6.39571        | -0.47738 | -1.65336 |  |
| 36            | 1             | -5.25786        | -2.2973  | -1.06009 |  |
| 37            | 6             | -5.98815        | 0.884735 | -1.78542 |  |
| 38            | 1             | -4.01061        | 1.861001 | -1.47051 |  |
| 39            | 1             | -7.39625        | -0.86477 | -1.79143 |  |
| 40            | 1             | -6.62155        | 1.72268  | -2.04425 |  |
| 41            | 1             | -4.0796         | 0.072697 | 2.562878 |  |
| 42            | 6             | -5.0912         | 0.302724 | 2.254432 |  |
| 43            | 6             | -6.14343        | -0.63813 | 2.078312 |  |
| 44            | 6             | -5.56847        | 1.581379 | 1.854479 |  |
| 45            | 6             | -7.28984        | 0.065039 | 1.588994 |  |
| 46            | 1             | -6.08203        | -1.70216 | 2.264037 |  |

|    |    |          |          |          |
|----|----|----------|----------|----------|
| 47 | 6  | -6.93296 | 1.441411 | 1.452409 |
| 48 | 1  | -4.99107 | 2.496183 | 1.834562 |
| 49 | 1  | -8.25067 | -0.37246 | 1.353272 |
| 50 | 1  | -7.5729  | 2.234463 | 1.089409 |
| 51 | 26 | -5.73338 | 0.248339 | 0.171107 |
| 52 | 78 | 2.361218 | -0.15427 | -0.09455 |

**3<sup>+</sup>**

| Center<br>Number | Atomic<br>Number | Coordinates (Å) |          |          |
|------------------|------------------|-----------------|----------|----------|
|                  |                  | X               | Y        | Z        |
| 1                | 7                | 4.155601        | -1.02445 | 0.265403 |
| 2                | 7                | 3.558831        | 1.474992 | -0.09122 |
| 3                | 8                | 0.59662         | 0.768977 | -0.45732 |
| 4                | 8                | 1.193167        | -1.81415 | -0.08741 |
| 5                | 6                | -0.40135        | -0.12773 | -0.54575 |
| 6                | 6                | -0.07416        | -1.50489 | -0.34194 |
| 7                | 6                | -1.08433        | -2.47976 | -0.42227 |
| 8                | 6                | -2.39134        | -2.10651 | -0.7033  |
| 9                | 1                | -3.15215        | -2.87686 | -0.77338 |
| 10               | 6                | -1.7115         | 0.231506 | -0.82839 |
| 11               | 6                | 4.329922        | -2.34884 | 0.428902 |
| 12               | 1                | 3.432132        | -2.95133 | 0.354407 |
| 13               | 6                | 5.584316        | -2.8924  | 0.676387 |
| 14               | 1                | 5.686859        | -3.96398 | 0.803151 |
| 15               | 6                | 6.686908        | -2.04007 | 0.755947 |
| 16               | 1                | 7.678564        | -2.43555 | 0.948217 |
| 17               | 6                | 6.503008        | -0.67013 | 0.585099 |
| 18               | 1                | 7.347483        | 0.00608  | 0.642962 |
| 19               | 6                | 5.221523        | -0.17581 | 0.338876 |
| 20               | 6                | 4.882965        | 1.240373 | 0.137907 |
| 21               | 6                | 5.791851        | 2.298709 | 0.16627  |
| 22               | 1                | 6.842773        | 2.110371 | 0.349049 |
| 23               | 6                | 5.336549        | 3.598296 | -0.04241 |
| 24               | 1                | 6.034799        | 4.428278 | -0.02231 |
| 25               | 6                | 3.977886        | 3.81718  | -0.27651 |
| 26               | 1                | 3.585474        | 4.813682 | -0.44351 |
| 27               | 6                | 3.114453        | 2.728997 | -0.29398 |
| 28               | 1                | 2.04902         | 2.823342 | -0.46894 |
| 29               | 1                | -0.82           | -3.52219 | -0.26995 |
| 30               | 1                | -1.93043        | 1.282782 | -0.98672 |
| 31               | 6                | -2.73293        | -0.74966 | -0.9123  |
| 32               | 6                | -4.09347        | -0.37662 | -1.23852 |
| 33               | 6                | -5.25288        | -1.23562 | -1.26325 |
| 34               | 6                | -4.5974         | 0.953034 | -1.47832 |
| 35               | 6                | -6.39571        | -0.47738 | -1.65336 |
| 36               | 1                | -5.25786        | -2.2973  | -1.06009 |
| 37               | 6                | -5.98815        | 0.884735 | -1.78542 |
| 38               | 1                | -4.01061        | 1.861001 | -1.47051 |
| 39               | 1                | -7.39625        | -0.86477 | -1.79143 |
| 40               | 1                | -6.62155        | 1.72268  | -2.04425 |
| 41               | 1                | -4.0796         | 0.072697 | 2.562878 |
| 42               | 6                | -5.0912         | 0.302724 | 2.254432 |
| 43               | 6                | -6.14343        | -0.63813 | 2.078312 |



|    |    |          |          |          |
|----|----|----------|----------|----------|
| 44 | 6  | -5.56847 | 1.581379 | 1.854479 |
| 45 | 6  | -7.28984 | 0.065039 | 1.588994 |
| 46 | 1  | -6.08203 | -1.70216 | 2.264037 |
| 47 | 6  | -6.93296 | 1.441411 | 1.452409 |
| 48 | 1  | -4.99107 | 2.496183 | 1.834562 |
| 49 | 1  | -8.25067 | -0.37246 | 1.353272 |
| 50 | 1  | -7.5729  | 2.234463 | 1.089409 |
| 51 | 26 | -5.73338 | 0.248339 | 0.171107 |
| 52 | 78 | 2.361218 | -0.15427 | -0.09455 |

**Table S4.** Coordinates of optimized gas-phase geometries of Pt(bpy)(C) and [Pt(bpy)(C)]<sup>++</sup> calculated using a DFT method (B3LYP or UB3LYP/ Lanl2DZ (Pt atom) and 6-31G(d) (all other atoms) levels of theory) with IEFPCM (CH<sub>2</sub>Cl<sub>2</sub>).

| Pt(bpy)(C)    |               |                 |          |          |  |
|---------------|---------------|-----------------|----------|----------|--|
| Center Number | Atomic Number | Coordinates (Å) |          |          |  |
|               |               | X               | Y        | Z        |  |
| 1             | 7             | 1.392852        | -1.29844 | 0.00013  |  |
| 2             | 7             | 1.3928          | 1.298451 | -0.00014 |  |
| 3             | 8             | -1.66794        | 1.33968  | -0.00024 |  |
| 4             | 8             | -1.66796        | -1.33974 | 0.000325 |  |
| 5             | 6             | -2.86641        | 0.708875 | -9.3E-05 |  |
| 6             | 6             | -2.86642        | -0.70891 | 0.000138 |  |
| 7             | 6             | -4.07962        | -1.40422 | 0.000119 |  |
| 8             | 6             | -5.29103        | -0.69872 | 0.000026 |  |
| 9             | 1             | -6.23063        | -1.2458  | 0.000031 |  |
| 10            | 6             | -4.0796         | 1.404209 | -0.00015 |  |
| 11            | 6             | 1.255941        | -2.63842 | 0.000152 |  |
| 12            | 1             | 0.234047        | -3.00022 | 0.000311 |  |
| 13            | 6             | 2.357948        | -3.48281 | -0.00001 |  |
| 14            | 1             | 2.209274        | -4.5566  | 0.000004 |  |
| 15            | 6             | 3.638913        | -2.92446 | -0.00024 |  |
| 16            | 1             | 4.518785        | -3.55912 | -0.00041 |  |
| 17            | 6             | 3.777344        | -1.5396  | -0.00024 |  |
| 18            | 1             | 4.762514        | -1.08872 | -0.00044 |  |
| 19            | 6             | 2.636109        | -0.73446 | -8E-06   |  |
| 20            | 6             | 2.636079        | 0.734522 | 0.000012 |  |
| 21            | 6             | 3.777278        | 1.539717 | 0.000236 |  |
| 22            | 1             | 4.762468        | 1.088877 | 0.000454 |  |
| 23            | 6             | 3.638782        | 2.924565 | 0.000197 |  |
| 24            | 1             | 4.518623        | 3.559268 | 0.00036  |  |
| 25            | 6             | 2.357791        | 3.482856 | -7.7E-05 |  |
| 26            | 1             | 2.20907         | 4.556641 | -0.00015 |  |
| 27            | 6             | 1.255823        | 2.638425 | -0.00023 |  |
| 28            | 1             | 0.23391         | 3.000169 | -0.00046 |  |
| 29            | 1             | -4.06207        | -2.49178 | 0.000205 |  |
| 30            | 1             | -4.06202        | 2.491768 | -0.00026 |  |
| 31            | 6             | -5.29102        | 0.698726 | -9.8E-05 |  |
| 32            | 78            | -0.1644         | -0.00002 | 0.000019 |  |
| 33            | 1             | -6.23061        | 1.245824 | -0.00016 |  |

[Pt(bpy)(C)]<sup>++</sup>

| Center Number | Atomic Number | Coordinates (Å) |    |  |    |
|---------------|---------------|-----------------|----|--|----|
|               |               | X               |    |  |    |
| 1             | 7             | 1.394696        | 1  |  | 7  |
| 2             | 7             | 1.394702        | 2  |  | 7  |
| 3             | 8             | -1.70886        | 3  |  | 8  |
| 4             | 8             | -1.70885        | 4  |  | 8  |
| 5             | 6             | -2.86767        | 5  |  | 6  |
| 6             | 6             | -2.86767        | 6  |  | 6  |
| 7             | 6             | -4.09736        | 7  |  | 6  |
| 8             | 6             | -5.27359        | 8  |  | 6  |
| 9             | 1             | -6.22393        | 9  |  | 1  |
| 10            | 6             | -4.09737        | 10 |  | 6  |
| 11            | 6             | 1.24718         | 11 |  | 6  |
| 12            | 1             | 0.22672         | 12 |  | 1  |
| 13            | 6             | 2.348863        | 13 |  | 6  |
| 14            | 1             | 2.196432        | 14 |  | 1  |
| 15            | 6             | 3.627861        | 15 |  | 6  |
| 16            | 1             | 4.506133        | 16 |  | 1  |
| 17            | 6             | 3.77319         | 17 |  | 6  |
| 18            | 1             | 4.759825        | 18 |  | 1  |
| 19            | 6             | 2.636763        | 19 |  | 6  |
| 20            | 6             | 2.636766        | 20 |  | 6  |
| 21            | 6             | 3.773198        | 21 |  | 6  |
| 22            | 1             | 4.759831        | 22 |  | 1  |
| 23            | 6             | 3.627878        | 23 |  | 6  |
| 24            | 1             | 4.506153        | 24 |  | 1  |
| 25            | 6             | 2.348883        | 25 |  | 6  |
| 26            | 1             | 2.196458        | 26 |  | 1  |
| 27            | 6             | 1.247195        | 27 |  | 6  |
| 28            | 1             | 0.226737        | 28 |  | 1  |
| 29            | 1             | -4.08236        | 29 |  | 1  |
| 30            | 1             | -4.08236        | 30 |  | 1  |
| 31            | 6             | -5.27359        | 31 |  | 6  |
| 32            | 78            | -0.14991        | 32 |  | 78 |
| 33            | 1             | -6.22393        | 33 |  | 1  |

**Table S5.** Coordinates of optimized gas-phase geometries of **5** and **5<sup>+</sup>** calculated using a DFT method (B3LYP or UB3LYP/ Lan12DZ (Fe atom) and 6-31G(d) (all other atoms) levels of theory) with IEFPCM (CH<sub>2</sub>Cl<sub>2</sub>).

**5**

| Center Number | Atomic Number | Coordinates (Å) |          |          |
|---------------|---------------|-----------------|----------|----------|
|               |               | X               | Y        | Z        |
| 1             | 26            | 3.080847        | -0.01848 | 0.029842 |
| 2             | 6             | -2.00426        | 0.052409 | 0.335059 |
| 3             | 6             | -0.66403        | -0.09119 | 0.662092 |
| 4             | 6             | 0.089419        | -1.1571  | 0.140501 |
| 5             | 6             | 1.51312         | -1.32021 | 0.489139 |
| 6             | 6             | 2.512933        | -1.99359 | -0.29218 |
| 7             | 6             | 3.747474        | -1.95337 | 0.419749 |
| 8             | 6             | 3.527977        | -1.25247 | 1.644247 |
| 9             | 6             | 2.158731        | -0.8578  | 1.687479 |

|    |   |          |          |          |
|----|---|----------|----------|----------|
| 10 | 6 | 2.31112  | 1.609766 | -1.01263 |
| 11 | 6 | 3.273968 | 0.925184 | -1.81538 |
| 12 | 6 | 4.522803 | 0.946264 | -1.12114 |
| 13 | 6 | 4.331541 | 1.643405 | 0.110778 |
| 14 | 6 | 2.964299 | 2.053182 | 0.177927 |
| 15 | 6 | -2.62996 | -0.86056 | -0.51706 |
| 16 | 6 | -1.90228 | -1.92471 | -1.0369  |
| 17 | 6 | -0.55408 | -2.0709  | -0.71048 |
| 18 | 1 | -0.20548 | 0.647126 | 1.311316 |
| 19 | 1 | 2.364539 | -2.42193 | -1.27464 |
| 20 | 1 | 4.69292  | -2.34901 | 0.072457 |
| 21 | 1 | 4.274576 | -1.03406 | 2.396609 |
| 22 | 1 | 1.68413  | -0.30547 | 2.48779  |
| 23 | 1 | 1.260961 | 1.733556 | -1.24397 |
| 24 | 1 | 3.083697 | 0.448361 | -2.76812 |
| 25 | 1 | 5.444182 | 0.487013 | -1.45492 |
| 26 | 1 | 5.08191  | 1.802003 | 0.874481 |
| 27 | 1 | 2.498019 | 2.579905 | 1.000403 |
| 28 | 1 | -2.39768 | -2.63214 | -1.69419 |
| 29 | 1 | -0.00218 | -2.91625 | -1.10857 |
| 30 | 8 | -2.74986 | 1.091944 | 0.889664 |
| 31 | 6 | -2.81136 | 2.273111 | 0.189204 |
| 32 | 8 | -2.23859 | 2.450226 | -0.85946 |
| 33 | 8 | -3.95495 | -0.66815 | -0.90109 |
| 34 | 6 | -4.94016 | -1.03484 | -0.01438 |
| 35 | 8 | -4.70906 | -1.53275 | 1.060953 |
| 36 | 6 | -6.29591 | -0.72865 | -0.59244 |
| 37 | 1 | -7.07071 | -1.04202 | 0.107587 |
| 38 | 1 | -6.38446 | 0.344707 | -0.78935 |
| 39 | 1 | -6.4228  | -1.24861 | -1.54731 |
| 40 | 6 | -3.67225 | 3.266208 | 0.922992 |
| 41 | 1 | -3.71045 | 4.200909 | 0.363217 |
| 42 | 1 | -4.68299 | 2.864736 | 1.048063 |
| 43 | 1 | -3.26532 | 3.446601 | 1.923116 |

5<sup>+</sup>

| Center<br>Number | Atomic<br>Number | Coordinates (Å) |          |          |
|------------------|------------------|-----------------|----------|----------|
|                  |                  | X               | Y        | Z        |
| 1                | 26               | -2.9736         | -0.05309 | 0.005197 |
| 2                | 6                | 2.030288        | 0.014249 | -0.28436 |
| 3                | 6                | 0.713372        | -0.14204 | -0.69256 |
| 4                | 6                | -0.02664        | -1.26174 | -0.28119 |
| 5                | 6                | -1.44842        | -1.38572 | -0.64348 |
| 6                | 6                | -2.45656        | -2.08498 | 0.108466 |
| 7                | 6                | -3.71198        | -1.93153 | -0.55274 |
| 8                | 6                | -3.50203        | -1.12295 | -1.71179 |
| 9                | 6                | -2.11692        | -0.78001 | -1.76441 |
| 10               | 6                | -2.10906        | 1.635309 | 0.913137 |
| 11               | 6                | -2.78693        | 0.84618  | 1.891962 |
| 12               | 6                | -4.16849        | 0.768865 | 1.523301 |
| 13               | 6                | -4.34526        | 1.511814 | 0.31556  |
| 14               | 6                | -3.07207        | 2.041178 | -0.06458 |
| 15               | 6                | 2.646069        | -0.96646 | 0.502745 |

|    |   |          |          |          |
|----|---|----------|----------|----------|
| 16 | 6 | 1.931883 | -2.09863 | 0.883622 |
| 17 | 6 | 0.598236 | -2.24113 | 0.506867 |
| 18 | 1 | 0.25847  | 0.635595 | -1.29355 |
| 19 | 1 | -2.30166 | -2.59566 | 1.049318 |
| 20 | 1 | -4.66271 | -2.31142 | -0.20401 |
| 21 | 1 | -4.26324 | -0.79044 | -2.40429 |
| 22 | 1 | -1.65707 | -0.14902 | -2.51278 |
| 23 | 1 | -1.04498 | 1.835963 | 0.876194 |
| 24 | 1 | -2.32773 | 0.350523 | 2.736702 |
| 25 | 1 | -4.93405 | 0.207296 | 2.04164  |
| 26 | 1 | -5.26713 | 1.610143 | -0.24147 |
| 27 | 1 | -2.86452 | 2.611819 | -0.95997 |
| 28 | 1 | 2.425617 | -2.85308 | 1.486617 |
| 29 | 1 | 0.051463 | -3.12619 | 0.814507 |
| 30 | 8 | 2.785577 | 1.116486 | -0.65413 |
| 31 | 6 | 2.339299 | 2.378797 | -0.32768 |
| 32 | 8 | 1.304966 | 2.588499 | 0.261075 |
| 33 | 8 | 3.934051 | -0.78377 | 0.978374 |
| 34 | 6 | 4.981659 | -0.89025 | 0.084957 |
| 35 | 8 | 4.825256 | -1.18916 | -1.07271 |
| 36 | 6 | 6.280705 | -0.58983 | 0.779822 |
| 37 | 1 | 7.108946 | -0.74364 | 0.088011 |
| 38 | 1 | 6.279636 | 0.447296 | 1.131686 |
| 39 | 1 | 6.398107 | -1.23422 | 1.656448 |
| 40 | 6 | 3.322693 | 3.409349 | -0.80736 |
| 41 | 1 | 2.943864 | 4.406946 | -0.58504 |
| 42 | 1 | 4.288345 | 3.259857 | -0.31358 |
| 43 | 1 | 3.484435 | 3.299121 | -1.88422 |

**Table S6.** Coordinates of optimized gas-phase geometries of  $1^+$  and  $2^+$  calculated using a DFT method (UB3LYP/ Lan12DZ (Fe atom) and 6-31G(d) (all other atoms) levels of theory) with IEFPCM ( $\text{CH}_2\text{Cl}_2$ ).

|               |               | $1^+$           |          |          |
|---------------|---------------|-----------------|----------|----------|
| Center Number | Atomic Number | Coordinates (Å) |          |          |
|               |               | X               | Y        | Z        |
| 1             | 26            | -2.36827        | -0.0471  | 0.001554 |
| 2             | 8             | 3.681281        | 1.824475 | 0.099851 |
| 3             | 8             | 4.782448        | -0.47415 | 0.534316 |
| 4             | 6             | 3.141263        | 3.120769 | -0.14049 |
| 5             | 6             | 2.881779        | 0.746805 | -0.10823 |
| 6             | 6             | 1.559001        | 0.80198  | -0.52503 |
| 7             | 6             | 0.804237        | -0.37841 | -0.71995 |
| 8             | 6             | -0.58249        | -0.30733 | -1.1859  |
| 9             | 6             | -1.50253        | -1.40777 | -1.33445 |
| 10            | 6             | -2.73935        | -0.91888 | -1.85283 |
| 11            | 6             | -2.6254         | 0.497903 | -1.99112 |
| 12            | 6             | -1.31747        | 0.874519 | -1.56032 |
| 13            | 6             | -1.85168        | 0.138273 | 2.032284 |
| 14            | 6             | -2.69524        | -0.999   | 1.843105 |
| 15            | 6             | -3.9437         | -0.54462 | 1.30803  |
| 16            | 6             | -3.86925        | 0.873667 | 1.160617 |
| 17            | 6             | -2.57403        | 1.294537 | 1.60174  |

|    |   |          |          |          |
|----|---|----------|----------|----------|
| 18 | 6 | 5.457374 | -1.70693 | 0.78673  |
| 19 | 6 | 3.493064 | -0.51767 | 0.131009 |
| 20 | 6 | 2.748674 | -1.68186 | -0.06469 |
| 21 | 6 | 1.419467 | -1.61332 | -0.48573 |
| 22 | 1 | 2.291437 | 3.327901 | 0.521616 |
| 23 | 1 | 2.827381 | 3.234348 | -1.1853  |
| 24 | 1 | 3.948068 | 3.822192 | 0.074822 |
| 25 | 1 | 1.10259  | 1.767    | -0.70336 |
| 26 | 1 | -1.30716 | -2.43975 | -1.0783  |
| 27 | 1 | -3.62116 | -1.51195 | -2.05394 |
| 28 | 1 | -3.40325 | 1.173157 | -2.32061 |
| 29 | 1 | -0.95466 | 1.891822 | -1.51629 |
| 30 | 1 | -0.82706 | 0.120365 | 2.377963 |
| 31 | 1 | -2.42324 | -2.02929 | 2.029545 |
| 32 | 1 | -4.77766 | -1.17106 | 1.021767 |
| 33 | 1 | -4.6359  | 1.511236 | 0.741814 |
| 34 | 1 | -2.1937  | 2.306902 | 1.575063 |
| 35 | 1 | 5.505827 | -2.32438 | -0.1176  |
| 36 | 1 | 4.968044 | -2.26894 | 1.590522 |
| 37 | 1 | 6.466222 | -1.43169 | 1.095396 |
| 38 | 1 | 3.199764 | -2.65223 | 0.10376  |
| 39 | 1 | 0.877247 | -2.5398  | -0.63928 |

**2<sup>+</sup>**

| Center Number | Atomic Number | Coordinates (Å) |          |          |
|---------------|---------------|-----------------|----------|----------|
|               |               | X               | Y        | Z        |
| 1             | 26            | -3.39123        | -1.12998 | 0.029473 |
| 2             | 26            | 3.416356        | -1.07282 | -0.00496 |
| 3             | 8             | 1.109192        | 4.328563 | -0.53621 |
| 4             | 8             | -1.21424        | 4.195285 | 0.607398 |
| 5             | 6             | 2.371519        | 4.465539 | -1.18205 |
| 6             | 6             | 0.615551        | 3.077634 | -0.35113 |
| 7             | 6             | 1.256724        | 1.899946 | -0.69983 |
| 8             | 6             | 0.675334        | 0.63041  | -0.46341 |
| 9             | 6             | 1.467862        | -0.56468 | -0.79319 |
| 10            | 6             | 1.473056        | -1.83366 | -0.10946 |
| 11            | 6             | 2.391321        | -2.71183 | -0.76216 |
| 12            | 6             | 3.006866        | -1.98641 | -1.82885 |
| 13            | 6             | 2.457884        | -0.66863 | -1.83387 |
| 14            | 6             | 4.055372        | 0.34659  | 1.412345 |
| 15            | 6             | 3.965559        | -0.94493 | 2.015091 |
| 16            | 6             | 4.863222        | -1.82191 | 1.323984 |
| 17            | 6             | 5.504927        | -1.07158 | 0.291441 |
| 18            | 6             | 4.999966        | 0.265843 | 0.342297 |
| 19            | 6             | -2.48689        | 4.196711 | 1.252856 |
| 20            | 6             | -0.66271        | 3.006567 | 0.269902 |
| 21            | 6             | -1.25357        | 1.763312 | 0.464012 |
| 22            | 6             | -0.62124        | 0.561115 | 0.090113 |
| 23            | 6             | -1.34771        | -0.716   | 0.288958 |
| 24            | 6             | -1.54414        | -1.76601 | -0.67209 |
| 25            | 6             | -2.22458        | -2.84456 | -0.03185 |
| 26            | 6             | -2.46951        | -2.46911 | 1.324064 |
| 27            | 6             | -1.9391         | -1.15968 | 1.521748 |

|    |   |          |          |          |
|----|---|----------|----------|----------|
| 28 | 6 | -4.36391 | 0.489804 | -0.84751 |
| 29 | 6 | -4.60888 | -0.69613 | -1.60328 |
| 30 | 6 | -5.25461 | -1.63949 | -0.74686 |
| 31 | 6 | -5.40853 | -1.0364  | 0.538351 |
| 32 | 6 | -4.85712 | 0.280065 | 0.477199 |
| 33 | 1 | 3.173764 | 4.002827 | -0.5936  |
| 34 | 1 | 2.551283 | 5.538559 | -1.257   |
| 35 | 1 | 2.354342 | 4.026069 | -2.18677 |
| 36 | 1 | 2.247816 | 1.94846  | -1.13341 |
| 37 | 1 | 0.899823 | -2.07295 | 0.773789 |
| 38 | 1 | 2.620769 | -3.726   | -0.46459 |
| 39 | 1 | 3.777554 | -2.35489 | -2.49213 |
| 40 | 1 | 2.747197 | 0.123301 | -2.51128 |
| 41 | 1 | 3.466162 | 1.213998 | 1.677228 |
| 42 | 1 | 3.302845 | -1.22364 | 2.823288 |
| 43 | 1 | 4.995293 | -2.87732 | 1.519716 |
| 44 | 1 | 6.209295 | -1.45791 | -0.43262 |
| 45 | 1 | 5.261415 | 1.067089 | -0.33592 |
| 46 | 1 | -2.45358 | 3.639447 | 2.196363 |
| 47 | 1 | -3.26292 | 3.774354 | 0.603653 |
| 48 | 1 | -2.71307 | 5.244113 | 1.454903 |
| 49 | 1 | -2.24825 | 1.700496 | 0.885774 |
| 50 | 1 | -1.24617 | -1.72959 | -1.71175 |
| 51 | 1 | -2.54115 | -3.76501 | -0.50455 |
| 52 | 1 | -2.99716 | -3.05798 | 2.06286  |
| 53 | 1 | -1.97022 | -0.58862 | 2.44081  |
| 54 | 1 | -3.85704 | 1.375563 | -1.20677 |
| 55 | 1 | -4.32561 | -0.86247 | -2.63442 |
| 56 | 1 | -5.54243 | -2.64799 | -1.01392 |
| 57 | 1 | -5.83506 | -1.50706 | 1.414585 |
| 58 | 1 | -4.80403 | 0.983982 | 1.297721 |

**Table S7.** Selected vertical excitation energies for  $\mathbf{3}^+$  and  $[\text{Pt}(\text{bpy})(\text{C})]^{++}$  predicted by TD-DFT with IEFPCM ( $\text{CH}_2\text{Cl}_2$ ).

| $\mathbf{3}^+$                           |        |        |         |                                   |              |
|------------------------------------------|--------|--------|---------|-----------------------------------|--------------|
| #                                        | $f$    | eV     | nm      | transition <sup>a</sup>           | coefficients |
| 2                                        | 0.0109 | 0.8881 | 1396.09 | $119\beta \rightarrow 120\beta$   | 0.82151      |
| 4                                        | 0.2493 | 1.5614 | 794.06  | $120\alpha \rightarrow 121\alpha$ | 0.76312      |
|                                          |        |        |         | $119\beta \rightarrow 120\beta$   | 0.52422      |
| 14                                       | 0.1967 | 2.5703 | 482.36  | $119\beta \rightarrow 122\beta$   | 0.62573      |
|                                          |        |        |         | $119\alpha \rightarrow 121\alpha$ | 0.60675      |
|                                          |        |        |         | $118\beta \rightarrow 120\beta$   | 0.20117      |
| $[\text{Pt}(\text{bpy})(\text{C})]^{++}$ |        |        |         |                                   |              |
| #                                        | $f$    | eV     | nm      | transition <sup>a</sup>           | coefficients |
| 4                                        | 0.0323 | 2.5135 | 493.27  | $78\alpha \rightarrow 79\alpha$   | 0.98325      |

5            0.2255            2.5893            478.84            75 $\beta$   $\rightarrow$  78 $\beta$             0.98693

<sup>a</sup> Main contributions (> 0.2) are shown.

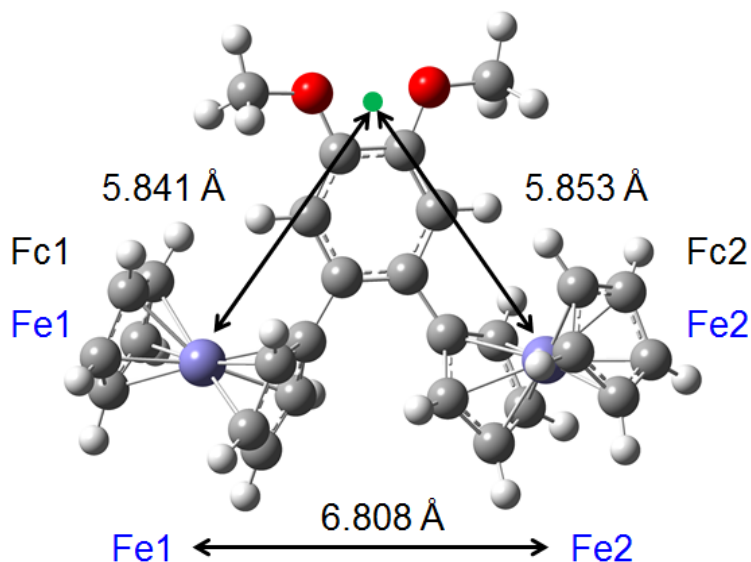

**Figure S17.** Optimized structures of 2<sup>+</sup> calculated using a DFT method (B3LYP/Lanl2DZ (Fe atom) and 6-31G(d) (all other atoms) levels of theory) with IEFPCM (CH<sub>2</sub>Cl<sub>2</sub>). The green dot indicates the center of C-C-C-O of the catechol moiety.

**Table S8.** DFT-calculated NPA charges of fragments with IEFPCM (CH<sub>2</sub>Cl<sub>2</sub>).<sup>a</sup>

| Compound             | Fc1      | Fc2     | C <sub>6</sub> H <sub>2</sub> O <sub>2</sub> | CH <sub>3</sub> |
|----------------------|----------|---------|----------------------------------------------|-----------------|
| <b>2</b>             | -0.019   | -0.019  | -0.620                                       | 0.659           |
| <b>2<sup>+</sup></b> | 0.0066   | 0.8643  | -0.5510                                      | 0.6798          |
|                      | (-0.003) | (1.019) | (-0.016)                                     | (-0.0001)       |

<sup>a</sup>NPA spin densities are also shown in parentheses.

**Table S9.** DFT-calculated frontier molecular orbital compositions of 2<sup>+</sup> (%) with IEFPCM (CH<sub>2</sub>Cl<sub>2</sub>).

| MO                 | <i>E</i> /eV | Fc1  | Fc2 | C <sub>6</sub> H <sub>2</sub> O <sub>2</sub> | CH <sub>3</sub> |
|--------------------|--------------|------|-----|----------------------------------------------|-----------------|
| 121 $\beta$ (LUMO) | -4.18        | 0    | 99  | 1                                            | 0               |
| 120 $\beta$ (HOMO) | -5.71        | 85.2 | 1.3 | 13.0                                         | 0.4             |

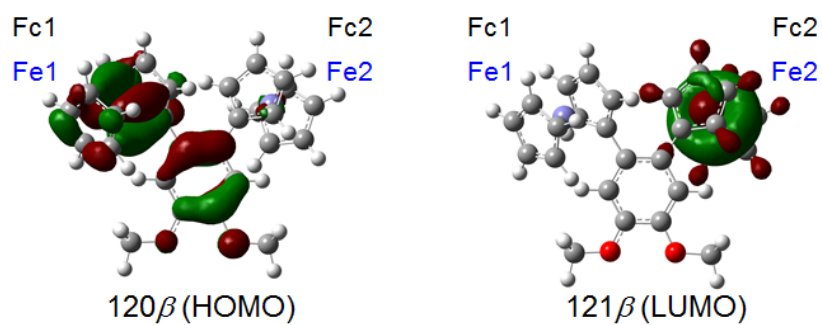

**Figure S18.** Frontier orbitals of  $2^+$  with IEFPCM ( $\text{CH}_2\text{Cl}_2$ ).



## 6. X-ray crystallographic data

**Table S10.** Summary of crystallographic data and refinement parameters for [FcV](I<sub>3</sub>), [FcVFc](I<sub>3</sub>), and [FcVFc](I<sub>3</sub>)<sub>2</sub>.

|                                                                       | [FcV](I <sub>3</sub> )                                          | [FcVFc](I <sub>3</sub> )                                                      | [FcVFc](I <sub>3</sub> ) <sub>2</sub>                                         |
|-----------------------------------------------------------------------|-----------------------------------------------------------------|-------------------------------------------------------------------------------|-------------------------------------------------------------------------------|
| empirical formula                                                     | C <sub>18</sub> H <sub>18</sub> FeI <sub>3</sub> O <sub>2</sub> | C <sub>28</sub> H <sub>26</sub> Fe <sub>2</sub> I <sub>3</sub> O <sub>2</sub> | C <sub>28</sub> H <sub>26</sub> Fe <sub>2</sub> I <sub>6</sub> O <sub>2</sub> |
| formula weight                                                        | 702.90                                                          | 886.92                                                                        | 1267.63                                                                       |
| crystal dimensions (mm)                                               | 0.100 × 0.070 × 0.020                                           | 0.070 × 0.040 × 0.010                                                         | 0.110 × 0.080 × 0.030                                                         |
| crystal system                                                        | triclinic                                                       | monoclinic                                                                    | monoclinic                                                                    |
| crystal colour, habit                                                 | brown, block                                                    | brown, block                                                                  | brown, block                                                                  |
| space group                                                           | P-1 (#2)                                                        | P2 <sub>1</sub> /n (#14)                                                      | C2/c (#15)                                                                    |
| temperature (°C)                                                      | −150.0                                                          | −150.0                                                                        | −150.0                                                                        |
| <i>a</i> (Å)                                                          | 9.8756(2)                                                       | 10.3656(2)                                                                    | 12.4059(3)                                                                    |
| <i>b</i> (Å)                                                          | 10.3246(2)                                                      | 27.5580(5)                                                                    | 14.7753(3)                                                                    |
| <i>c</i> (Å)                                                          | 10.3781(2)                                                      | 10.6174(2)                                                                    | 18.8792(4)                                                                    |
| <i>α</i> (deg)                                                        | 84.8912(7)                                                      | 90                                                                            | 90                                                                            |
| <i>β</i> (deg)                                                        | 79.7892(7)                                                      | 112.2398(7)                                                                   | 102.6439(7)                                                                   |
| <i>γ</i> (deg)                                                        | 88.3020(7)                                                      | 90                                                                            | 90                                                                            |
| <i>V</i> (Å <sup>3</sup> )                                            | 1037.16(4)                                                      | 2807.29(9)                                                                    | 3376.6(1)                                                                     |
| <i>Z</i>                                                              | 2                                                               | 4                                                                             | 4                                                                             |
| $\rho_{\text{calcd}}$ (g cm <sup>−3</sup> )                           | 2.251                                                           | 2.098                                                                         | 2.493                                                                         |
| F(000)                                                                | 654.00                                                          | 1684.00                                                                       | 2320.00                                                                       |
| $\mu$ (MoK $\alpha$ ) (cm <sup>−1</sup> )                             | 52.005                                                          | 43.566                                                                        | 63.702                                                                        |
| 2 $\phi_{\text{max}}$ (deg)                                           | 55.0                                                            | 55.0                                                                          | 54.9                                                                          |
| GOF                                                                   | 1.128                                                           | 1.094                                                                         | 1.160                                                                         |
| R1 <sup>a</sup>                                                       | 0.0436                                                          | 0.0173                                                                        | 0.0349                                                                        |
| wR2 <sup>b</sup>                                                      | 0.1116                                                          | 0.0389                                                                        | 0.1165                                                                        |
| $\Delta\rho_{\text{max}}/\Delta\rho_{\text{min}}$ (e/Å <sup>3</sup> ) | 4.49/−0.92                                                      | 0.75/−0.44                                                                    | 4.99/−1.13                                                                    |
| CCDC No.                                                              | 987994                                                          | 987989                                                                        | 987990                                                                        |

<sup>a</sup>R1 =  $\Sigma ||F_o| - |F_c|| / \Sigma |F_o|$ . <sup>b</sup>wR2 =  $[\Sigma (w(F_o^2 - F_c^2)^2) / \Sigma w(F_o^2)^2]^{1/2}$ .

## 7. Chemical oxidation followed by $^1\text{H-NMR}$

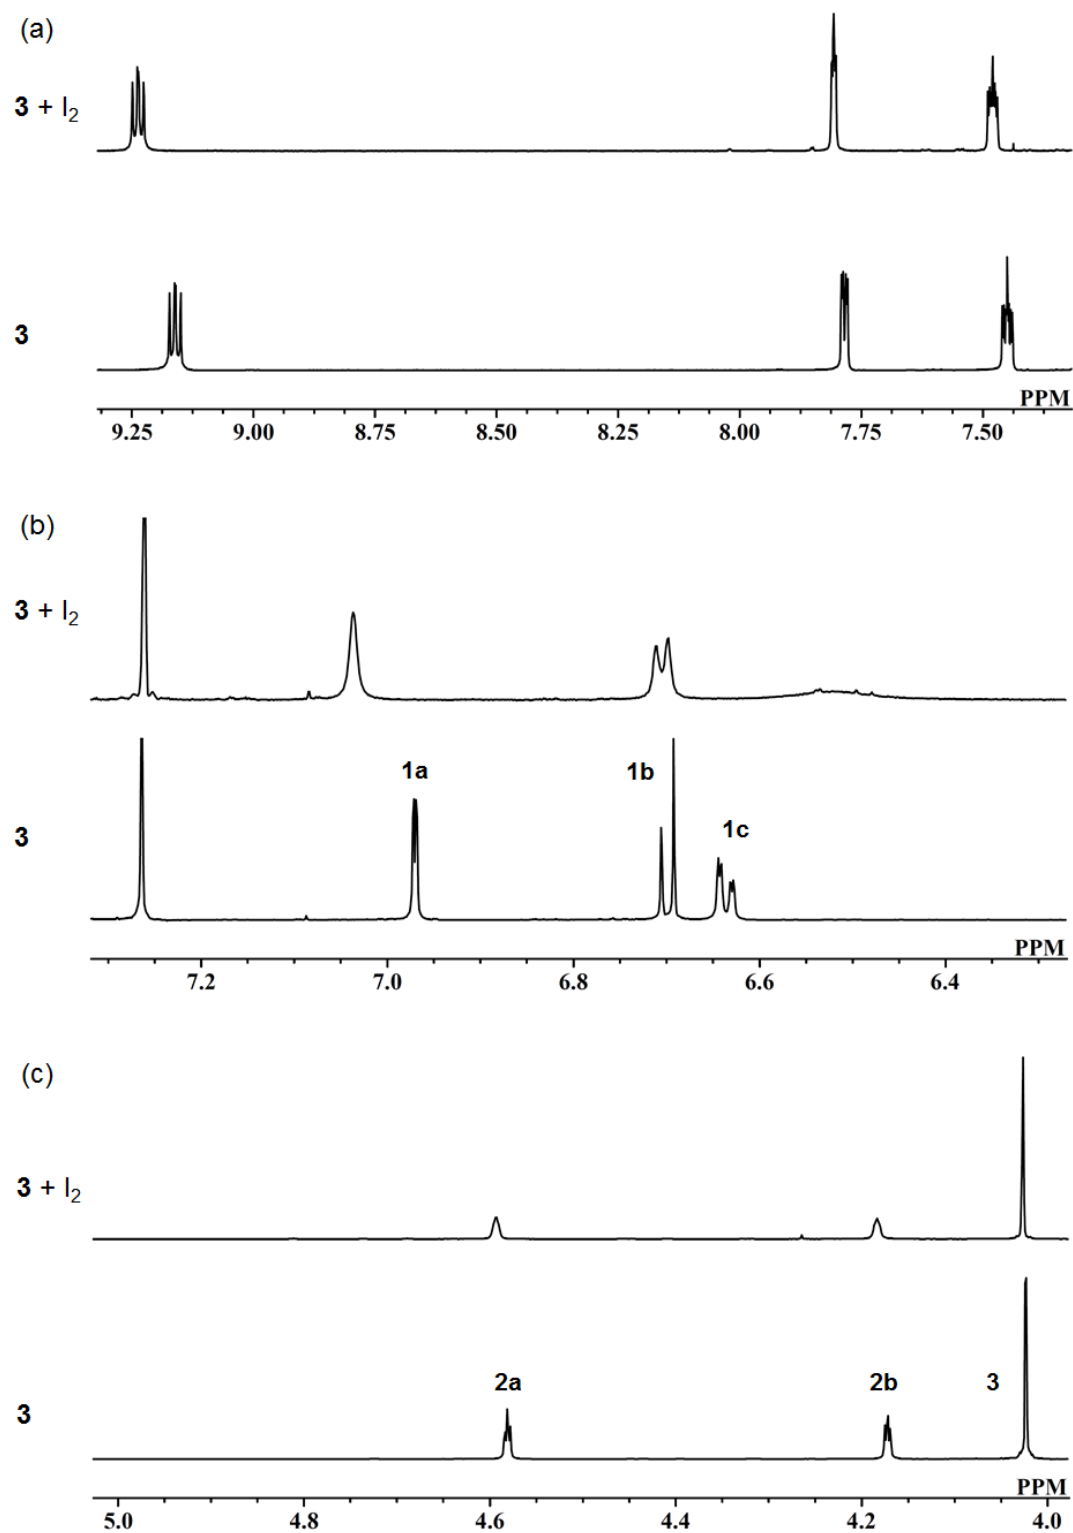

**Figure S18.** Partial  $^1\text{H-NMR}$  spectra of **1** (5.0 mM) in the absence (bottom) and presence of 0.020 equiv. of  $\text{I}_2$  (top) corresponding to (a) bpy, (b)  $\text{C}_6\text{H}_3\text{O}_2$ , and (c) Fc moieties.
